# Supplementary material for: Sequence Homology at the Breakpoint and Clinical Phenotype of Mitochondrial DNA Deletion Syndromes
Source: PLoS One. 2010 Dec 20;5(12):e15687. doi: 10.1371/journal.pone.0015687 (PMC3004954; doi:10.1371/journal.pone.0015687)
Supplement: Table S1 — The “breakpoint nucleotide” refers to the nucleotide position at which the breakpoint has occurred, either in the 5′ or the 3′ position. A majority of the subjects analyzed have either a single nucleotide, or a stretch of identical nucleotides (direct repeats), present at the two breakpoints flanking the deletion. As such, the sequence alignment of the breakpoints does not allow us to predict if the breakpoint happens at the 5′ or the 3′ of the overlapping nucleotide/s at the breakpoint 1 and 2 respectively. We refer to the common region of overlap as the “breakpoint nucleotide”. The breakpoint nucleotide is indicated in columns proximal breakpoint reference sequence (5′ to 3′) and distal breakpoint sequence (5′ to 3′) with “[]”. In cases with direct repeats at breakpoints, which are longer than 1 nucleotide, the most 5′ nucleotide of the direct repeat is indicated with the bracket. These correspond to the nucleotides that are labeled in red color in Figure 3 and Figure S2. The sequences in the Proximal breakpoint reference sequence column which are 3′ from the breakpoint nucleotide, and sequences in the Distal breakpoint sequence column which are 5′ from the breakpoint nucleotide represent the 5′ and 3′ sequences of the deleted molecule respectively. In cases where there is not a common nucleotide(s) at the two breakpoints, the sequence breakpoint is predicted to be 3′ to the breakpoint nucleotide in the breakpoint 1 sequence, and 5′ to the breakpoint nucleotide in the breakpoint 2 sequence. All sequences are presented in 5′ to 3′ direction, left to right. (XLSX) [file pone.0015687.s003.xlsx]

## Sheet: Sheet1
Sample number	Age	Gender	Clinical Diagnosis	Clinical manifestations									Tissue	% Heteroplasmy	BP1 (Proximal) location	BP2 (Distal) location	Deletion Size	Proximal breakpoint reference sequence (5' to 3')	Distal breakpoint reference sequence (5' to 3')	Direct Repeat (Y/N)	Direct Repeat Sequence (>2 BP)	% Homology	# affected genes
				Neuromuscular	Ophthalmology	Cardiac	Endocrine	GI	Growth	Renal	Hematology	Metabolic
2	0.25	F	Pearson Syndrome	DD				GER			Pancytopenia		Blood	70	5479	12949	7470	CTCATCGCCCTTACCACGCTACTC[C]TACCTATCTCCCCTTTTATACTAA	AGACCCACAACAAATAGCCCTTCT[A]AACGCTAATCCAAGCCTCACCCCA	N		53	23
62	0.5	M	Pearson Syndrome								Anemia		Blood	65	10892	16074	5182	CATCCCCCTACTATTTTTTAACCA[A]ATCAACAACAACCTATTTAGCTGT	GTACCACCCAAGTATTGACTCACC[C]ATCAACAACCGCTATGTATTTCGT	N		57	10
21	0.8	F	Pearson Syndrome	DD							Pancytopenia		Blood	86	8470	13447	4977	AAATATTAAACACAAACTACCACCT[A]CCTCCCTCACCAAAGCCCATAAA	ACTCAAAACCATACCTCTCACTTCA[A]CCTCCCTCACCATTGGCAGCCTA	Y	ACCTCCCTCACCA	55	12
22	1	M	Pearson Syndrome								Anemia, neutropenia		Blood	64	8470	13447	4977	AAATATTAAACACAAACTACCACCT[A]CCTCCCTCACCAAAGCCCATAAA	ACTCAAAACCATACCTCTCACTTCA[A]CCTCCCTCACCATTGGCAGCCTA	Y	ACCTCCCTCACCA	55	12
23	1	F	Multisystem	DD, hypotonia			Diabetes	Pancreatic insufficiency	FTT			Lactic acidosis	Blood	80	8470	13447	4977	AAATATTAAACACAAACTACCACCT[A]CCTCCCTCACCAAAGCCCATAAA	ACTCAAAACCATACCTCTCACTTCA[A]CCTCCCTCACCATTGGCAGCCTA	Y	ACCTCCCTCACCA	55	12
46	1	F	Multisystem	DD, myopathy				Diarrhea, liver dysfunction	FTT	Renal failure		Lactic acidosis	Blood	65	8539	15572	7033	CCTGAGAACCAAAATGAACGAAAA[T]CTGTTCGCTTCATTCATTGCCCCC	CATCAAGCCCGAATGATATTTCCT[A]TTCGCCTACACAATTCTCCGATCC	N		51	15
59	1	M	Pearson Syndrome								Anemia		Blood	82	10048	13407	3359	CAATTAACTAGTTTTGACAACATTC[A]AAAAAGAGTAATAAACTTCGCCT	ACCTTAACAATGAACAAGATATTCG[A]AAAATAGGAGGACTACTCAAAAC	Y	AAAAA	49	9
60	1	F	Pearson Syndrome, multisystem	Exercise intolerance, hemiparesis		Cardio-myopathy					Pancytopenia	Lactic acidosis	Blood	70	10059	13379	3320	TTTTGACAACATTCAAAAAAGAGT[A]ATAAACTTCGCCTTAATTTTAATA	TTTATGTGCTCCGGGTCCATCATC[C]ACAACCTTAACAATGAACAAGATA	N		35	8
67	1	NA	Pearson Syndrome, multisystem	DD				Constipation	FTT		Anemia	Lactic acidosis	Blood	90	12103	14414	2311	CCTATCCCCCATTCTCCTCCTATC[C]CTCAACCCCGACATCATTACCGGG	ACCCCACTAAAACACTCACCAAGA[C]CTCAACCCCTGACCCCCATGCCTCA	Y	CCTCAACCCC	49	5
63	1.1	F	Multisystem					GER, recurrent vomiting, gastroparesis				Lactic acidosis	Blood	68	10944	15362	4418	CAACCTTTTCCTCCGACCCCCTAA[C]AACCCCCCTCCTAATACTAACTA	CTATTCTTGCACGAAACGGGATCA[A]ACAACCCCCTAGGAATCACCTCCC	Y	CAA	45	8
64	1.5	M	Multisystem	Developmental delay				GER, recurrent vomiting	FTT		Pancytopenia	Lactic acidosis	Blood	83	10952	15371	4419	CAACCTTTTCCTCCGACCCCCTAA[C]AACCCCCCTCCTAATACTAACTA	CTATTCTTGCACGAAACGGGATCA[A]ACAACCCCCTAGGAATCACCTCCC	Y	CAA	45	8
66	1.5	F	Multisystem	DD, myopathy				Liver failure, diarrhea	FTT			Lactic acidosis	Blood	60	11262	15362	4100	CTACTCATCGCACTAATTTACACT[C]ACAACACCCTAGGCTCACTAAACA	CCTATTCTTGCACGAAACGGGATC[A]AACAACCCCCTAGGAATCACCTCC	N		57	8
7	2	F	Multisystem	Seizures				GER, recurrent vomiting				Lactic acidosis	Blood	90	6718	14834	8116	AAAAAAGAACCATTTGGATACATA[G]GTATGGTCTGAGCTATGATATCAA	CCCCACCCCATCCAACATCTCCGC[A]TGATGAAACTTCGGCTCACTCCTT	N		35	20
12	3	F	Multisystem	DD, mental retardation, fatigue			Exocrine/ pancreatic deficiency,	Pancreatitis, diarrhea, vomiting, RTA	FTT			Low plasma carnitine	Blood	63	7998	15439	7441	CCAGGCGACCTGCGACTCCTTGAC[G]TTGACAATCGAGTAGTACTCCCGA	ACTACACAATCAAAGACGCCCTCG[G]CTTACTTCTCTTCCTTCTCTCCTT	N		39	17
50	5	F	Multisystem				Adrenal insufficiency		Liver dysfunction	Tubulopathy		Lactic acidosis	Blood	40	8637	16073	7436	ATTGATCCCCACCTCCAAATATCT[C]ATCAACAACCGACTAATCACCACC	GTACCACCCAAGTATTGACTCACC[C]ATCAACAACCGCTATGTATTTCGT	Y	CATCAACAACCG	51	16
54	5	F	Multisystem	Hypotonia, migraines, ataxia, muscle cramps, fatigue, excersise intolerance, ptosis				GER, diarrhea, RTA	Short stature				Blood	17	8637	16073	7436	ATTGATCCCCACCTCCAAATATCT[C]ATCAACAACCGACTAATCACCACC	GTACCACCCAAGTATTGACTCACC[C]ATCAACAACCGCTATGTATTTCGT	Y	CATCAACAACCG	51	16
58	5	F	PEO		Ophthalmoplegia								Blood	62	9619	15835	6216	CCACTCCTAAACACATCCGTATTA[C]TCGCATCAGGAGTATCAATCACCT	TCCGTACTATACTTCACAACAATC[C]TAATCCTAATACCAACTATCTCCC	Y	CT	43	13
24	6	M	Multisystem				Addison disease			Renal failure			Muscle	65	8470	13447	4977	AAATATTAAACACAAACTACCACCT[A]CCTCCCTCACCAAAGCCCATAAA	ACTCAAAACCATACCTCTCACTTCA[A]CCTCCCTCACCATTGGCAGCCTA	Y	ACCTCCCTCACCA	55	12
48	6	M	Multisystem^										Muscle	70	8623	15662	7039	TATTTCCCCCTCTATTGATCCCCA[C]CTCCAAATATCTCATCAACAACCG	CCTCATCCTAGCAATAATCCCCAT[C]CTCCATATATCCAAACAACAAAGC	Y	ACTCCA	61	14
8	7	M	Multisystem	DD, myopathy, elevated CSF protein, hearing loss	Ptosis, pigmentary retinopathy	Heart block	Hypo-parathyroidism		Short stature, microcephaly				Blood	51	7487	14414	6927	GCTTAAAAACAGATGCAATTCCCG[G]ACGTCTAAACCAAACCACTTTCAC	CCCCACTAAAACACTCACCAAGAC[C]TCAACCCCTGACCCCCATGCCTCA	N		47	17
25	8	F	Renal tubular acidosis							RTA		Lactic acidosis	Muscle	67	8470	13447	4977	AAATATTAAACACAAACTACCACCT[A]CCTCCCTCACCAAAGCCCATAAA	ACTCAAAACCATACCTCTCACTTCA[A]CCTCCCTCACCATTGGCAGCCTA	Y	ACCTCCCTCACCA	55	12
61	8	NA	Multisystem	DD, elevated CSF protein, myopathy, ataxia							Anemia	Lactic acidosis	Muscle	55	10560	14980	4420	TCGCTCACACCTCATATCCTCCCT[A]CTATGCCTAGAAGGAATAATACTA	CTCGAGACGTAAATTATGGCTGAA[T]CATCCGCTACCTTCACGCCAATGG	N		35	9
5	9	M	Multisystem		Ptosis	Heart block	Hypo-parathyroidism						Blood	44	6331	14004	7673	AACTACTCCCACCCTGGAGCCTCC[G]TAGACCTAACCATCTTCTCCTTAC	TGCCCCTACTCCTCCTAGACCTAA[C]CTGACTAGAAAAGCTATTACCTAA	N		41	17
26	9	M	PEO, MM	Myopathy	Ophthalmoplegia, ptosis				FTT, short stature				Muscle	67	8470	13447	4977	AAATATTAAACACAAACTACCACCT[A]CCTCCCTCACCAAAGCCCATAAA	ACTCAAAACCATACCTCTCACTTCA[A]CCTCCCTCACCATTGGCAGCCTA	Y	ACCTCCCTCACCA	55	12
47	11	M	KSS	Ataxia, hearing loss	PR, ptosis, ophthalmoplegia	Heart block	Addison disease	Constipation	Short stature	Tubulopathy			Muscle	65	8558	14425	5867	AAATCTGTTCGCTTCATTCATTGC[C]CCCACAATCCTAGGCCTACCCGCG	ACTCACCAAGACCTCAACCCCTGA[C]CCCCATGCCTCAGGATACTCCTCA	Y	CCCC	45	12
51	11	M	Hearing loss	Hearing loss	Pigmentary retinopathy								Blood	35	8637	16073	7436	ATTGATCCCCACCTCCAAATATCT[C]ATCAACAACCGACTAATCACCACC	GTACCACCCAAGTATTGACTCACC[C]ATCAACAACCGCTATGTATTTCGT	Y	CATCAACAACCG	51	16
9	13	F	Multisystem	Ataxia, myopathy	Ophthalmoplegia, ptosis								Blood	56	7488	14415	6927	GAACCCCCCAAAGCTGGTTTCAAG[C]CAACCCCATGGCCTCCATGACTTT	CCCCACTAAAACACTCACCAAGAC[C]TCAACCCCTGACCCCCATGCCTCA	N		57	17
27	13.5	F	KSS	Headache	PR, ptosis, ophthalmoplegia	Heart block							Muscle	61	8470	13447	4977	AAATATTAAACACAAACTACCACCT[A]CCTCCCTCACCAAAGCCCATAAA	ACTCAAAACCATACCTCTCACTTCA[A]CCTCCCTCACCATTGGCAGCCTA	Y	ACCTCCCTCACCA	55	12
45	14	M	Multisystem	Ataxia, myopathy	Ophthalmoplegia, ptosis	Heart block, cardiomyopathy						Lactic acidosis	Muscle	27	8470	13447	4977	AAATATTAAACACAAACTACCACCT[A]CCTCCCTCACCAAAGCCCATAAA	ACTCAAAACCATACCTCTCACTTCA[A]CCTCCCTCACCATTGGCAGCCTA	Y	ACCTCCCTCACCA	55	12
52	14	M	KSS	Hearing loss, ataxia, speech delay	PR, ptosis, ophthalmoplegia				microcephaly			Lactic acidosis	Blood	36	8637	16073	7436	ATTGATCCCCACCTCCAAATATCT[C]ATCAACAACCGACTAATCACCACC	GTACCACCCAAGTATTGACTCACC[C]ATCAACAACCGCTATGTATTTCGT	Y	CATCAACAACCG	51	16
28	16	M	KSS^										Muscle	62	8470	13447	4977	AAATATTAAACACAAACTACCACCT[A]CCTCCCTCACCAAAGCCCATAAA	ACTCAAAACCATACCTCTCACTTCA[A]CCTCCCTCACCATTGGCAGCCTA	Y	ACCTCCCTCACCA	55	12
53	17	M	KSS	DD, dementia, seizures, ataxia, hearing loss	PR, ptosis, ophthalmoplegia		Diabetes, hypocalcaemia	Pancreatitis	growth retardation	Tubulopathy, renal failure			Blood	20	8637	16073	7436	ATTGATCCCCACCTCCAAATATCT[C]ATCAACAACCGACTAATCACCACC	GTACCACCCAAGTATTGACTCACC[C]ATCAACAACCGCTATGTATTTCGT	Y	CATCAACAACCG	51	16
55	18	F	Multisystem	DD, elevated CSF protein, hearing loss	Pigmentary retinopathy		Diabetes, hypo-parathyroidism		Short stature		Pancytopenia		Fibroblast	45	8637	16073	7436	ATTGATCCCCACCTCCAAATATCT[C]ATCAACAACCGACTAATCACCACC	GTACCACCCAAGTATTGACTCACC[C]ATCAACAACCGCTATGTATTTCGT	Y	CATCAACAACCG	51	16
29	20	M	KSS^										Muscle	45	8470	13447	4977	AAATATTAAACACAAACTACCACCT[A]CCTCCCTCACCAAAGCCCATAAA	ACTCAAAACCATACCTCTCACTTCA[A]CCTCCCTCACCATTGGCAGCCTA	Y	ACCTCCCTCACCA	55	12
30	20	M	PEO		Ophthalmoplegia								Muscle	88	8470	13447	4977	AAATATTAAACACAAACTACCACCT[A]CCTCCCTCACCAAAGCCCATAAA	ACTCAAAACCATACCTCTCACTTCA[A]CCTCCCTCACCATTGGCAGCCTA	Y	ACCTCCCTCACCA	55	12
3	24	M	PEO		Ophthalmoplegia, ptosis				FTT				Muscle	58	5835	10830	4995	AAAATCACCTCGGAGCTGGTAAAA[A]GAGGCCTAACCCCTGTCTTTAGAT	TGACTTTCCAAAAAGCACATAATT[T]GAATCAACACAACCACCCACAGCC	N		38	15
31	24	M	Multisystem	Spasticity, dystonia, myopathy	Ophthalmoplegia, ptosis	Arrhythmia	Diabetes					Lactic acidosis	Muscle	24	8470	13447	4977	AAATATTAAACACAAACTACCACCT[A]CCTCCCTCACCAAAGCCCATAAA	ACTCAAAACCATACCTCTCACTTCA[A]CCTCCCTCACCATTGGCAGCCTA	Y	ACCTCCCTCACCA	55	12
65	25	F	Multisystem	Myopathy	Pigmentary retinopathy, ptosis								Muscle	47	10958	13988	3030	TCCTCCGACCCCCTAACAACCCCC[C]TCCTAATACTAACTACCTGACTCC	CTTACGAGCCAAAACCTGCCCCTA[C]TCCTCCTAGACCTAACCTGACTAG	Y	CTCC	57	5
11	26	F	KSS	Headache, ataxia, peripheral neuropathy	PR, ptosis, ophthalmoplegia				FTT, short stature, microcephaly				Blood	48	7868	13448	5580	CATAACAGACGAGGTCAACGATCC[C]TCCCTTACCATCAAATCAATTGGC	TCAAAACCATACCTCTCACTTCAA[C]CTCCCTCACCATTGGCAGCCTAGC	Y	CCTCCCT	45	14
13	26	M	MM	Myopathy	Ptosis				Microcephaly				Muscle	11	8140	13578	5438	ACGTCTAAACCAAACCACTTTCAC[C]GCTACACGACCGGGGGTATACTAC	CTGAGCCCTATCTATTACTCTCAT[C]GCTACCTCCCTGACAAGCGCCTAT	Y	CGCTAC	49	14
32	26	F	KSS^										Muscle	10	8470	13447	4977	AAATATTAAACACAAACTACCACCT[A]CCTCCCTCACCAAAGCCCATAAA	ACTCAAAACCATACCTCTCACTTCA[A]CCTCCCTCACCATTGGCAGCCTA	Y	ACCTCCCTCACCA	55	12
57	26	M	PEO, MM	Myopathy	Ophthalmoplegia								Muscle	32	9516	15635	6119	GGATTTTTCTGAGCCTTTTACCAC[T]CCAGCCTAGCCCCTACCCCCCAAC	GGAGGCGTCCTTGCCCTATTACTA[T]CCATCCTCATCCTAGCAATAATCC	Y	TCCA	53	13
33	27	F	PEO, MM	Myopathy	Ophthalmoplegia, ptosis								Muscle	85	8470	13447	4977	AAATATTAAACACAAACTACCACCT[A]CCTCCCTCACCAAAGCCCATAAA	ACTCAAAACCATACCTCTCACTTCA[A]CCTCCCTCACCATTGGCAGCCTA	Y	ACCTCCCTCACCA	55	12
34	28	M	KSS^										Muscle	33	8470	13447	4977	AAATATTAAACACAAACTACCACCT[A]CCTCCCTCACCAAAGCCCATAAA	ACTCAAAACCATACCTCTCACTTCA[A]CCTCCCTCACCATTGGCAGCCTA	Y	ACCTCCCTCACCA	55	12
49	28	M	Multisystem	Easy fatigability	Ophthalmoplegia		Diabetes						Blood	10	8628	16171	7543	TTCCCCCTCTATTGATCCCCACCT[C]CAAATATCTCATCAACAACCGACT	ACCACCTGTAGTACATAAAAACCC[A]ACCCACATCAAACCCCCCCCCCCC	N		45	16
15	31	F	KSS	Myopathy, elevated CSF protein	PR, ptosis, ophthalmoplegia,								Muscle	82	8427	15640	7213	ATTACCCCCATACTCCTTACACTA[T]TCCTCATCACCCAACTAAAAATAT	GCGTCCTTGCCCTATTACTATCCA[T]CCTCATCCTAGCAATAATCCCCAT	N		53	15
1	34	M	Diabetes and hearing loss	Hearing loss			Diabetes						Blood	50	3643	15569	11926	TATTCTAGCCACCTCTAGCCTAGC[C]GTTTACTCAATCCTCTGATCAGGG	CCACATCAAGCCCGAATGATATTT[C]CTATTCGCCTACACAATTCTCCGA	N		47	30
19	34	F	Multisystem	Encephalopathy, headache	Ophthalmoplegia		Hypothyroidism						Muscle	50	8468	13580	5112	AAAATATTAAACACAAACTACCAC[C]TACCTCCCTCACCAAAGCCCATAA	CTGAGCCCTATCTATTACTCTCAT[C]GCTACCTCCCTGACAAGCGCCTAT	Y	CTACCTCCCT	53	11
35	36	F	MM	Myopathy, peripheral neuropathy	ptosis	Arrhythmia							Muscle	64	8470	13447	4977	AAATATTAAACACAAACTACCACCT[A]CCTCCCTCACCAAAGCCCATAAA	ACTCAAAACCATACCTCTCACTTCA[A]CCTCCCTCACCATTGGCAGCCTA	Y	ACCTCCCTCACCA	55	12
36	36	M	PEO, MM	Myopathy	Ophthalmoplegia								Muscle	70	8470	13447	4977	AAATATTAAACACAAACTACCACCT[A]CCTCCCTCACCAAAGCCCATAAA	ACTCAAAACCATACCTCTCACTTCA[A]CCTCCCTCACCATTGGCAGCCTA	Y	ACCTCCCTCACCA	55	12
17	38.5	F	PEO, MM	Myopathy, headache	Ophthalmoplegia, ptosis			Constipation					Muscle	33	8429	14059	5630	ATTACCCCCATACTCCTTACACTA[T]TCCTCATCACCCAACTAAAAATAT	TTCACAGCACCAAATCTCCACCTC[C]ATCATCACCTCAACCCAAAAAGGC	N		55	12
37	39	F	PEO		Ophthalmoplegia								Muscle	60	8470	13447	4977	AAATATTAAACACAAACTACCACCT[A]CCTCCCTCACCAAAGCCCATAAA	ACTCAAAACCATACCTCTCACTTCA[A]CCTCCCTCACCATTGGCAGCCTA	Y	ACCTCCCTCACCA	55	12
38	39	F	PEO, MM	Myopathy	Ophthalmoplegia, ptosis								Muscle	42	8470	13447	4977	AAATATTAAACACAAACTACCACCT[A]CCTCCCTCACCAAAGCCCATAAA	ACTCAAAACCATACCTCTCACTTCA[A]CCTCCCTCACCATTGGCAGCCTA	Y	ACCTCCCTCACCA	55	12
6	40	F	Multisystem	Ataxia, myopathy, peripheral neuropathy	Ptosis			Gastroparesis, diarrhea					Muscle	24	6331	14004	7673	AACTACTCCCACCCTGGAGCCTCC[G]TAGACCTAACCATCTTCTCCTTAC	TGCCCCTACTCCTCCTAGACCTAA[C]CTGACTAGAAAAGCTATTACCTAA	N		41	17
14	41	F	KSS		PR, ptosis ophthalmoplegia	Arrhythmia							Muscle	92	8388	11364	2976	GAAATGCCCCAACTAAATACTACC[G]TATGGCCCACCATAATTACCCCCA	TTAATATGACTAGCTTACACAATA[G]CTTTTATAGTAAAGATACCTCTTT	N		45	8
18	42	M	KSS^										Muscle	70	8467	14372	5905	AAAAATATTAAACACAAACTACCA[C]CTACCTCCCTCACCAAAGCCCATA	TACTCTTTCACCCACAGCACCAAT[C]CTACCTCCATCGCTAACCCCACTA	Y	CCTACCTCC	61	13
39	44	F	KSS^										Muscle	70	8470	13447	4977	AAATATTAAACACAAACTACCACCT[A]CCTCCCTCACCAAAGCCCATAAA	ACTCAAAACCATACCTCTCACTTCA[A]CCTCCCTCACCATTGGCAGCCTA	Y	ACCTCCCTCACCA	55	12
40	45	F	Multisystem	Myopathy, headache	Ophthalmoplegia, ptosis		Hypothyroidism	Diarrhea, constipation					Muscle	49	8470	13447	4977	AAATATTAAACACAAACTACCACCT[A]CCTCCCTCACCAAAGCCCATAAA	ACTCAAAACCATACCTCTCACTTCA[A]CCTCCCTCACCATTGGCAGCCTA	Y	ACCTCCCTCACCA	55	12
16	46	M	Multisystem	Myopathy	Ophthalmoplegia, ptosis								Muscle	47	8427	15640	7213	ATTACCCCCATACTCCTTACACTA[T]TCCTCATCACCCAACTAAAAATAT	GCGTCCTTGCCCTATTACTATCCA[T]CCTCATCCTAGCAATAATCCCCAT	N		53	15
10	48	F	PEO, MM	Myopathy	Ophthalmoplegia, ptosis								Muscle	14	7865	15409	7544	CATAACAGACGAGGTCAACGATCC[C]TCCCTTACCATCAAATCAATTGGC	CCCATTCCGATAAAATCACCTTCC[A]CCCTTACTACACAATCAAAGACGC	N		61	17
56	48	F	Multisystem	Myopathy, peripheral neuropathy	Ophthalmoplegia, ptosis								Muscle	38	9256	13625	4369	ATATAGTAAAACCCAGCCCATGAC[C]CCTAACAGGGGCCCTCTCAGCCCT	ATAGCACTCGAATAATTCTTCTCA[C]CCTAACAGGTCAACCTCGCTTCCC	Y	CCCTAACAGG	49	10
41	56	M	PEO, MM	Myopathy, headache	Ophthalmoplegia			Gastroparesis					Muscle	55	8470	13447	4977	AAATATTAAACACAAACTACCACCT[A]CCTCCCTCACCAAAGCCCATAAA	ACTCAAAACCATACCTCTCACTTCA[A]CCTCCCTCACCATTGGCAGCCTA	Y	ACCTCCCTCACCA	55	12
4	57	F	PEO, MM	Myopathy	Ophthalmoplegia, ptosis								Muscle	13	6076	11301	5225	ACGACCACATCTACAACGTTATCG[T]CACAGCCCATGCATTTGTAATAAT	CACTAAACATTCTACTACTCACTC[T]CACTGCCCAAGAACTATCAAACTC	Y	TCAC	55	13
20	59	F	PEO		Ophthalmoplegia, ptosis								Muscle	22	8469	16072	7603	AATATTAAACACAAACTACCACCT[A]CCTCCCTCACCAAAGCCCATAAAA	TGGGTACCACCCAAGTATTGACTC[A]CCCATCAACAACCGCTATGTATTT	Y	ACC	47	17
42	60	M	PEO, MM	Myopathy	Ophthalmoplegia								Muscle	45	8470	13447	4977	AAATATTAAACACAAACTACCACCT[A]CCTCCCTCACCAAAGCCCATAAA	ACTCAAAACCATACCTCTCACTTCA[A]CCTCCCTCACCATTGGCAGCCTA	Y	ACCTCCCTCACCA	55	12
43	60	F	PEO, MM	Myopathy	Ophthalmoplegia								Muscle	6	8470	13447	4977	AAATATTAAACACAAACTACCACCT[A]CCTCCCTCACCAAAGCCCATAAA	ACTCAAAACCATACCTCTCACTTCA[A]CCTCCCTCACCATTGGCAGCCTA	Y	ACCTCCCTCACCA	55	12
44	78	F	PEO, MM	Myopathy	Ophthalmoplegia, ptosis								Muscle	27	8470	13447	4977	AAATATTAAACACAAACTACCACCT[A]CCTCCCTCACCAAAGCCCATAAA	ACTCAAAACCATACCTCTCACTTCA[A]CCTCCCTCACCATTGGCAGCCTA	Y	ACCTCCCTCACCA	55	12
